# Supplementary material
Source: publisher figshare collection journal article supplement (https://acs.figshare.com/ndownloader/files/4192969)
Supplement: Supplementary file 1 [file 4192969]

## Supplementary Information

### Nanocluster Formation and its role in Graphene Chemical Vapor Deposition Growth

#### SI-1. Various $C_{21}$ isomers on Rh(111)

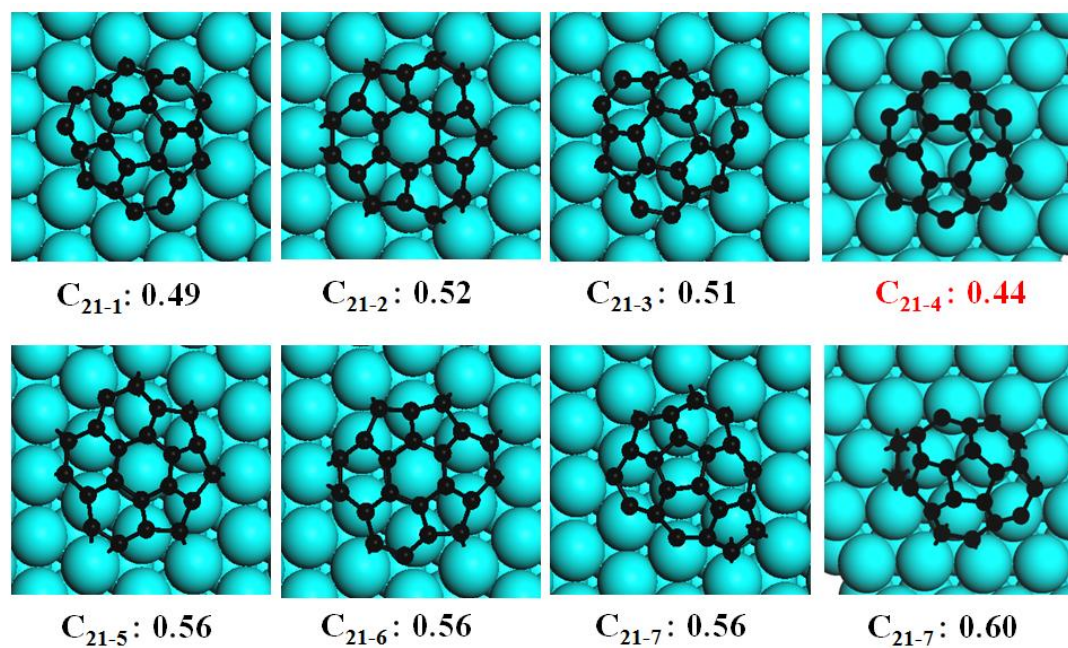

**Figure S1.** Various isomers of  $C_{21}@Rh(111)$  and corresponding energy (in eV per C atom).

## SI-2. Ground structures of $C_N$ ( $N=16-24$ ) cluster supported by different metal surfaces.

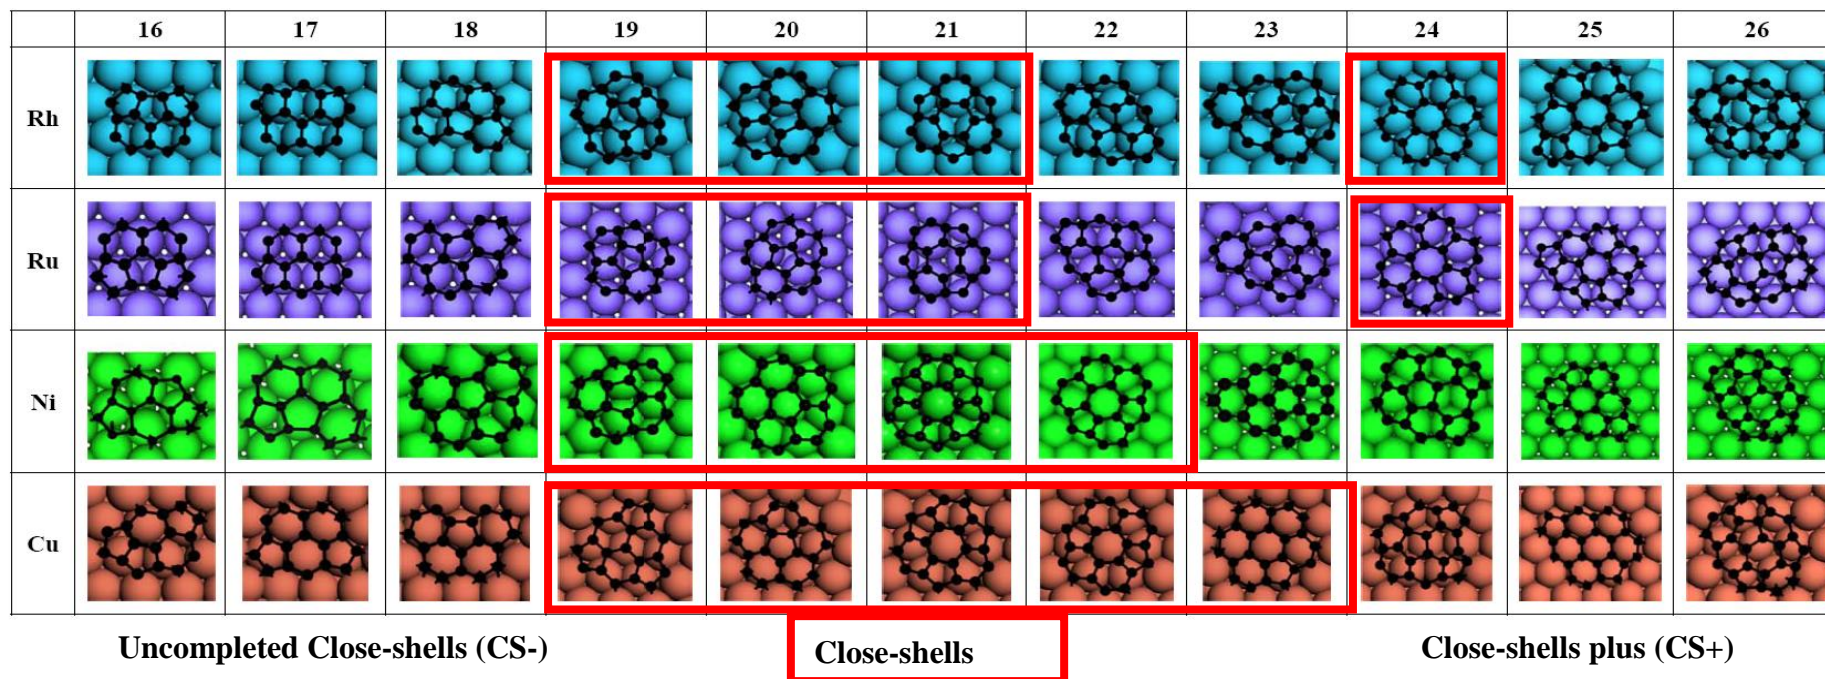

**Figure S2.** Ground structures of  $C_N$  ( $N=16-24$ ) cluster supported by different metal surfaces. Structures labeled by red rectangle are close-shell structures, left structures are uncompleted close-shell structures and those on the right are close-shell plus one or two rings. Each  $C_N$  cluster has several possible network structures and the most stable one was selected as the ground structure.

**SI-3. Simulated STM images of  $C_{21}$  and  $C_{24}$  clusters on Ru(0001), Ni(111) and Cu(111) surfaces.**

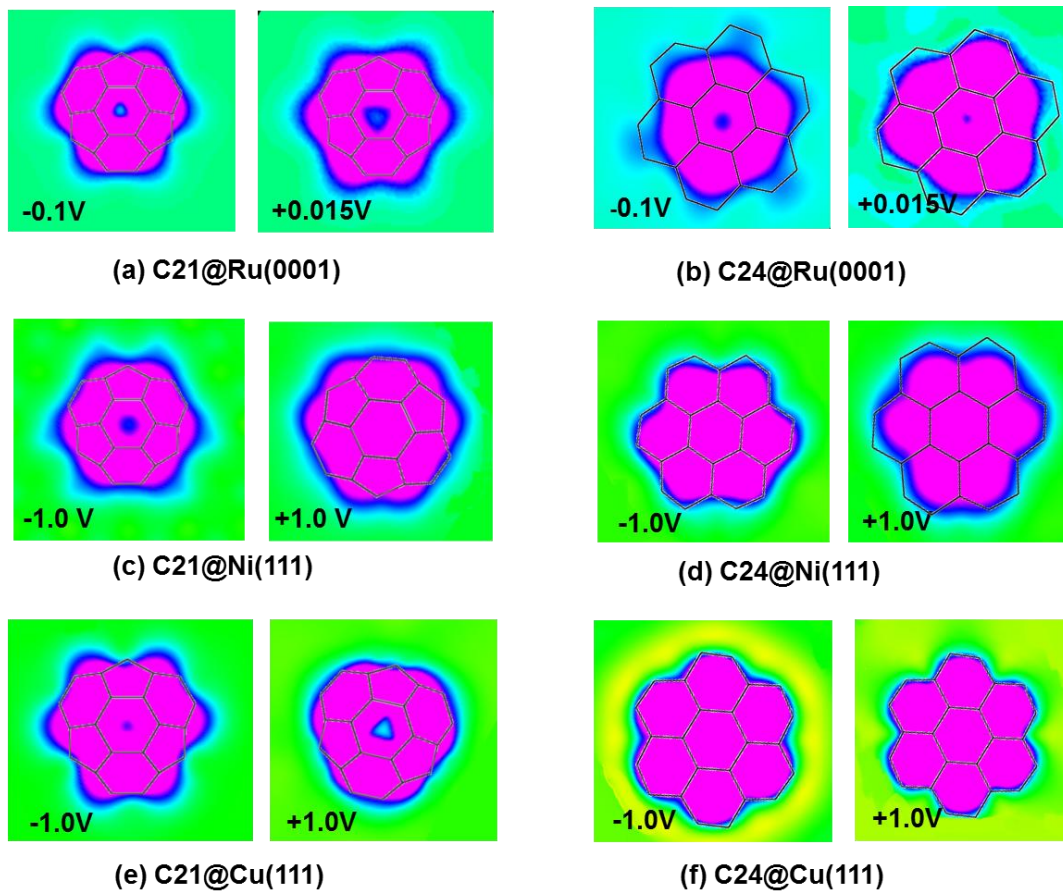

**Figure S3.** DFT simulated STM images of  $C_{21}$  and  $C_{24}$  cluster on various metal surface and their atomic structure: (a)  $C_{21}@Ru(0001)$  under bias voltage of -0.1V and +0.015 V; (b)  $C_{24}@Ru(0001)$  under bias voltage of -0.1V and +0.015 V; (c)  $C_{21}@Ni(111)$  under bias voltage of -1.0V and +1.0 V; (d)  $C_{24}@Ni(111)$  under bias voltage of -1.0 V and +1.0 V; (e)  $C_{21}@Cu(111)$  under bias voltage of -1.0 V and +1.0 V; (f)  $C_{24}@Cu(111)$  under bias voltage of -0.1V and +0.015 V.

#### SI-4. The preference of upright standing graphene nanoribbon

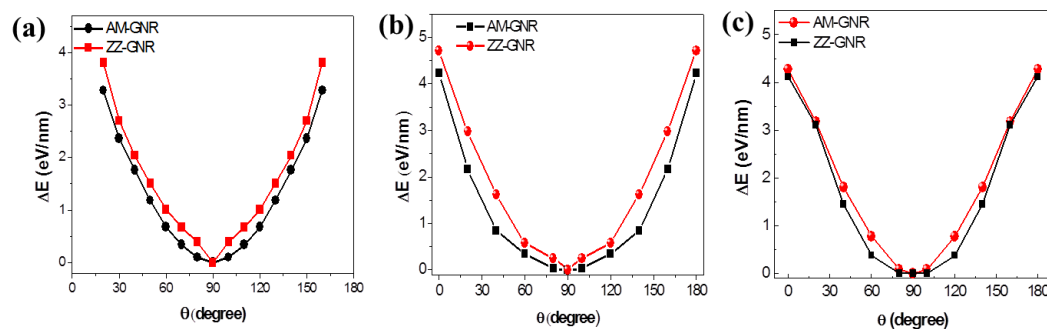

**Figure S4.** The preference of upright standing zigzag graphene nanoribbon (ZZ-GNR) and armchair graphene nanoribbon (AM-GNR) formation on (a) Ni(111), (b) Ru(0001), and (c) Cu(111) surface.
